# Supplementary material for: Electron-deficient copper pnictides: A2Mg3Cu9Pn7 (A = Sr, Eu; Pn = P, As) and Eu5Mg2.39Cu16.61As12
Source: Royal Society of Chemistry journal article supplement (doi:10.1039/c6qi00221h), 2016-01-01

## Supporting Information

### Contents

1. EDX analysis on the single crystals of  $\text{Eu}_5\text{Mg}_{2.39}\text{Cu}_{16.61}\text{As}_{12}$ .
2. **Table S1.** Refined atomic coordinates and isotropic displacement parameters of  $\text{Sr}_2\text{Mg}_3\text{Cu}_9\text{P}_7$ ,  $\text{Sr}_2\text{Mg}_3\text{Cu}_9\text{As}_7$  and  $\text{Eu}_2\text{Mg}_3\text{Cu}_9\text{P}_7$ .
3. **Figure S1.** Powder X-ray diffraction patterns of  $\text{Eu}_2\text{Mg}_3\text{Cu}_9\text{As}_7$  recorded at room temperature. The simulated patterns are provided for comparison as well.

# 1. EDX analysis on the single crystals of $\text{Eu}_5\text{Mg}_{2.39}\text{Cu}_{16.61}\text{As}_{12}$ .

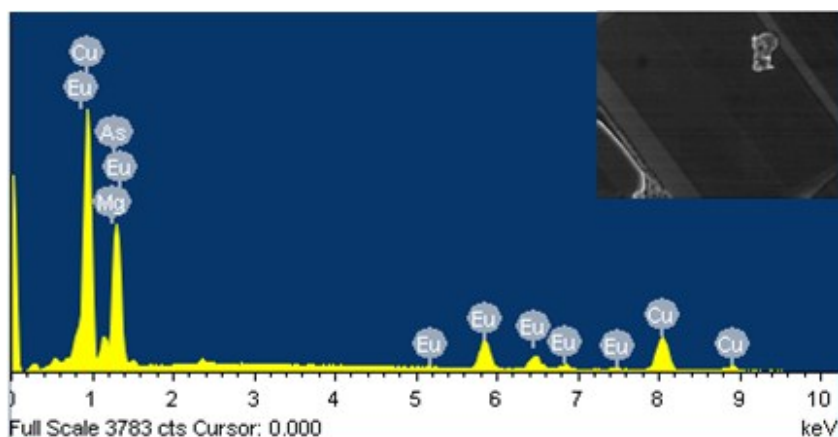

## Sample 1

| Element | Weight% | Atomic% | Composition |
|---------|---------|---------|-------------|
| Mg K    | 2.76    | 8.58    | 3.02        |
| Cu L    | 38.72   | 46.12   | 16.27       |
| As L    | 31.54   | 31.86   | 11.24       |
| Eu L    | 26.99   | 13.44   | 4.74        |

## Sample 2

| Element | Weight% | Atomic% | Composition |
|---------|---------|---------|-------------|
| Mg K    | 2.50    | 7.72    | 2.72        |
| Cu L    | 40.17   | 47.37   | 16.71       |
| As L    | 32.85   | 32.85   | 11.59       |
| Eu L    | 24.48   | 12.07   | 4.26        |

## Sample 3

| Element | Weight% | Atomic% | Composition |
|---------|---------|---------|-------------|
| Mg K    | 2.45    | 7.54    | 2.65        |
| Cu L    | 39.19   | 46.86   | 16.53       |
| As L    | 31.36   | 31.52   | 11.12       |
| Eu L    | 26.59   | 13.68   | 4.82        |

**Averaged Composition:**  $\text{Eu}_{4.61}\text{Mg}_{2.79}\text{Cu}_{16.50}\text{As}_{11.32}$

**Table S1.** Refined atomic coordinates and isotropic displacement parameters of  $\text{Sr}_2\text{Mg}_3\text{Cu}_9\text{P}_7$ ,  $\text{Sr}_2\text{Mg}_3\text{Cu}_9\text{As}_7$  and  $\text{Eu}_2\text{Mg}_3\text{Cu}_9\text{P}_7$ .

| Atoms                                          | Wyckoff   | x           | y           | z      | $U_{\text{eq}}$ ( $\text{\AA}^2$ ) |
|------------------------------------------------|-----------|-------------|-------------|--------|------------------------------------|
| $\text{Sr}_2\text{Mg}_3\text{Cu}_9\text{P}_7$  |           |             |             |        |                                    |
| Sr1                                            | <i>1f</i> | 2/3         | 1/3         | 0.5000 | 0.0095(7)                          |
| Sr2                                            | <i>1c</i> | 1/3         | 2/3         | 0.0000 | 0.0090(8)                          |
| Mg                                             | <i>3k</i> | 0.2253(7)   | 0.1163(7)   | 0.5000 | 0.0118(15)                         |
| Cu1                                            | <i>3k</i> | 0.0505(3)   | 0.4339(3)   | 0.5000 | 0.0132(6)                          |
| Cu2                                            | <i>3j</i> | 0.1262(3)   | 0.2835(3)   | 0.0000 | 0.0129(5)                          |
| Cu3                                            | <i>3j</i> | 0.4247(3)   | 0.3685(3)   | 0.0000 | 0.0146(6)                          |
| P1                                             | <i>3k</i> | 0.2928(6)   | 0.4077(6)   | 0.5000 | 0.0071(11)                         |
| P2                                             | <i>3j</i> | 0.4147(6)   | 0.1065(6)   | 0.0000 | 0.0095(12)                         |
| P3                                             | <i>1a</i> | 0.0000      | 0.0000      | 0.0000 | 0.0121(18)                         |
| $\text{Sr}_2\text{Mg}_3\text{Cu}_9\text{As}_7$ |           |             |             |        |                                    |
| Sr1                                            | <i>1f</i> | 2/3         | 1/3         | 0.5000 | 0.0091(4)                          |
| Sr2                                            | <i>1c</i> | 1/3         | 2/3         | 0.0000 | 0.0084(4)                          |
| Mg                                             | <i>3k</i> | 0.2244(5)   | 0.1103(5)   | 0.5000 | 0.0137(9)                          |
| Cu1                                            | <i>3k</i> | 0.37715(18) | 0.43060(18) | 0.5000 | 0.0134(4)                          |
| Cu2                                            | <i>3j</i> | 0.15738(16) | 0.28495(16) | 0.0000 | 0.0123(3)                          |
| Cu3                                            | <i>3j</i> | 0.4216(2)   | 0.0574(2)   | 0.0000 | 0.0146(4)                          |
| As1                                            | <i>3k</i> | 0.11324(14) | 0.40937(14) | 0.5000 | 0.0092(3)                          |
| As2                                            | <i>3j</i> | 0.41745(14) | 0.30899(13) | 0.0000 | 0.0072(3)                          |
| As3                                            | <i>1a</i> | 0.0000      | 0.0000      | 0.0000 | 0.0076(4)                          |
| $\text{Eu}_2\text{Mg}_3\text{Cu}_9\text{P}_7$  |           |             |             |        |                                    |
| Eu1                                            | <i>1f</i> | 2/3         | 1/3         | 0.5000 | 0.0088(2)                          |
| Eu2                                            | <i>1c</i> | 1/3         | 2/3         | 0.0000 | 0.0078(3)                          |
| Mg                                             | <i>3k</i> | 0.2252(5)   | 0.1064(5)   | 0.5000 | 0.0093(10)                         |
| Cu1                                            | <i>3k</i> | 0.3856(2)   | 0.4341(2)   | 0.5000 | 0.0111(4)                          |
| Cu2                                            | <i>3j</i> | 0.15941(18) | 0.28417(18) | 0.0000 | 0.0107(3)                          |
| Cu3                                            | <i>3j</i> | 0.4246(2)   | 0.0550(2)   | 0.0000 | 0.0118(4)                          |
| P1                                             | <i>3k</i> | 0.1185(5)   | 0.4102(5)   | 0.5000 | 0.0080(7)                          |
| P2                                             | <i>3j</i> | 0.4183(4)   | 0.3048(4)   | 0.0000 | 0.0065(7)                          |
| P3                                             | <i>1a</i> | 0.0000      | 0.0000      | 0.0000 | 0.0070(9)                          |

<sup>a</sup>  $U_{\text{eq}}$  is defined as one third of the trace of the orthogonalized  $U^{\text{ij}}$  tensor.

**Figure S1.** Powder X-ray diffraction patterns of  $\text{Eu}_2\text{Mg}_3\text{Cu}_9\text{As}_7$  recorded at room temperature. The simulated patterns are provided for comparison as well.

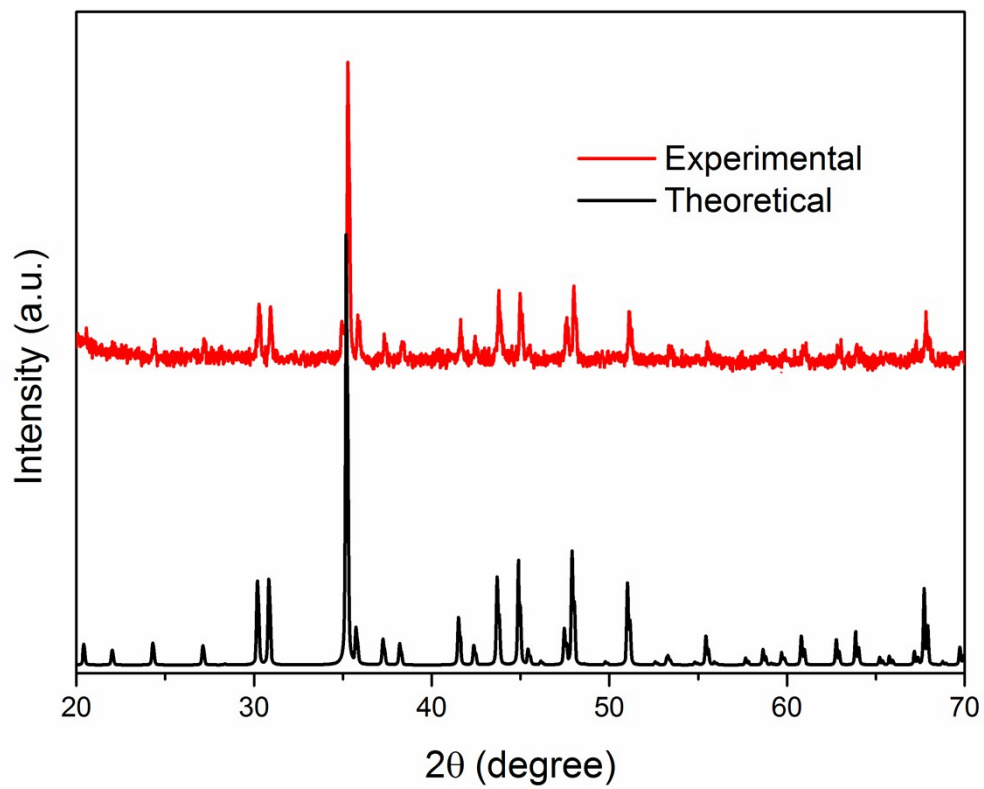

Supplement: c6qi00221h1.pdf [file c6qi00221h1.pdf]
